# Supplementary material
Source: publisher figshare collection journal article supplement (https://sage.figshare.com/ndownloader/files/23184308)
Supplement: Supplementary file 1 [file 23184308]

## APPENDICES

**Appendix Table 1: Summary of Survey Counts and Response Rates**

| Survey Administration     | Timeline                                      | Response Rate |
|---------------------------|-----------------------------------------------|---------------|
| PST Pre-Student Teaching  | Fall: Aug-Sep 2014<br>Spr: Dec-Jan 2015       | 84%           |
| PST Post-Student Teaching | Fall: Dec 2014-Jan 2015<br>Spr: May-June 2015 | 65%           |
| CT Post-Student Teaching  | Fall: Dec 2014-Jan 2015<br>Spr: May-June 2015 | 73%           |

*Note: Over half (57%) of PSTs in our sample completed both a pre and a post student teaching survey. For more details about the response rates and samples see Authors (forthcoming).*

**Appendix Table 2: Comparing Analytic vs. Non-Analytic Sample of PSTs, CTs, and FPSs**

|                                                                   | <i>Non-Analytic Sample (n=817)</i> |                  | <i>Analytic Sample (n=305)</i> |                  |                                   |
|-------------------------------------------------------------------|------------------------------------|------------------|--------------------------------|------------------|-----------------------------------|
|                                                                   | N                                  | Percent/<br>Mean | N                              | Percent/<br>Mean | Chi-Square/ T-<br>Test Difference |
| <i>PSTs</i>                                                       |                                    |                  |                                |                  |                                   |
| Male                                                              | 723                                | 26.0%            | 304                            | 28.0%            | 0.4                               |
| White                                                             | 817                                | 56.7%            | 305                            | 57.4%            | 0.0                               |
| Latino                                                            | 817                                | 14.1%            | 305                            | 22.0%            | 10.2**                            |
| Black                                                             | 817                                | 7.1%             | 305                            | 10.2%            | 2.9                               |
| Asian                                                             | 817                                | 6.6%             | 305                            | 5.6%             | 0.4                               |
| Other                                                             | 817                                | 17.3%            | 305                            | 5.9%             | 23.5***                           |
| Graduated from CPS                                                | 753                                | 19.1%            | 305                            | 28.5%            | 11.2**                            |
| Undergraduate GPA (1-100 scale)                                   | 727                                | 89.1             | 305                            | 91.6             | 2.5***                            |
| Prior teaching experience^                                        | 424                                | 31.4%            | 220                            | 30.5%            | 0.1                               |
| Age during student-teaching ^                                     | 422                                | 25.6             | 218                            | 26.2             | 0.8                               |
| Parent during student-teaching ^                                  | 425                                | 11.3%            | 219                            | 11.9%            | 0.0                               |
| Self-perceived preparedness^                                      | 431                                | 0.0              | 225                            | -0.0             | 0.0                               |
| CT-perceived preparedness^                                        | 439                                | -0.0             | 226                            | 0.1              | 0.1                               |
| <i>CTs</i>                                                        |                                    |                  |                                |                  |                                   |
| Male                                                              | 563                                | 25.4%            | 282                            | 24.1%            | 0.2                               |
| White                                                             | 563                                | 69.6%            | 282                            | 66.0%            | 1.2                               |
| Latino                                                            | 563                                | 20.1%            | 282                            | 23.4%            | 0.2                               |
| Black                                                             | 563                                | 10.1%            | 282                            | 11.0%            | 1.3                               |
| Asian                                                             | 563                                | 6.4%             | 282                            | 3.2%             | 3.8                               |
| Other                                                             | 563                                | 3.7%             | 282                            | 5.3%             | 1.2                               |
| Graduated from CPS^                                               | 431                                | 26.5%            | 220                            | 28.6%            | 0.4                               |
| Advanced degree (e.g. M.A.)                                       | 563                                | 76.6%            | 282                            | 78.0%            | 0.2                               |
| Tenure                                                            | 562                                | 91.8%            | 280                            | 92.1%            | 0.1                               |
| National Board certification                                      | 562                                | 18.7%            | 280                            | 18.6%            | 0.0                               |
| Years of CPS service                                              | 555                                | 11.8             | 278                            | 12.1             | 0.2                               |
| Average Observational Rating                                      | 555                                | 3.5              | 279                            | 3.5              | 0.0                               |
| Reading VAM                                                       | 143                                | 0.2              | 86                             | 0.2              | 0.0                               |
| Math VAM                                                          | 106                                | 0.2              | 68                             | 0.1              | -0.1                              |
| PST Perception of CT Teaching Effectiveness (Standardized Rasch)^ | 425                                | 0.0              | 220                            | -0.0             | 0.0                               |
| <i>Field Placement Schools</i>                                    |                                    |                  |                                |                  |                                   |
| Concentration of poverty (scon)                                   | 608                                | -0.1             | 295                            | -0.0             | 0.1**                             |
| High school level (9-12)                                          | 615                                | 27.6%            | 299                            | 33.4%            | 3.3                               |
| Majority Black students                                           | 608                                | 10.2%            | 295                            | 13.6%            | 2.2                               |
| Majority Latino students                                          | 608                                | 34.9%            | 295                            | 40.7%            | 2.9                               |
| School prior achievement                                          | 600                                | 0.2              | 292                            | 0.1              | -0.0                              |
| PST-Perceived working conditions (3.5 or higher, out of 4)^       | 410                                | 61.8%            | 222                            | 62.6%            | 0.0                               |
| 5E: Involved Families                                             | 589                                | 67.1             | 282                            | 65.9             | -1.1                              |
| 5E: Collaborative Teachers                                        | 592                                | 62.6             | 282                            | 61.4             | -1.4                              |
| 5E: Ambitious Instruction                                         | 592                                | 67.2             | 285                            | 67.0             | -0.1                              |
| 5E: Supportive Environment                                        | 589                                | 56.9             | 285                            | 55.1             | -1.4                              |
| 5E: Effective Leader                                              | 589                                | 54.6             | 282                            | 53.5             | -1.2                              |

^ These items draw on PST or CT survey items and therefore have lower sample sizes than other PST items, which draw on registration data or other CT items, which draw on personnel data. (Note: +p<0.10; \*p<0.05; \*\*p<0.01; \*\*\*p<0.001)

**Appendix Table 3: Comparing Within Analytic Sample of PSTs and CTs**

|                                                                  | <i>Do Not have Focal Preparedness Measure</i>                                                                          |                  | <i>Have Focal Preparedness Measure</i> |                  |                                  |
|------------------------------------------------------------------|------------------------------------------------------------------------------------------------------------------------|------------------|----------------------------------------|------------------|----------------------------------|
|                                                                  | N                                                                                                                      | Percent/<br>Mean | N                                      | Percent/<br>Mean | Chi-Square/ T-Test<br>Difference |
| <i>PSTs</i>                                                      |                                                                                                                        |                  |                                        |                  |                                  |
| Male                                                             | 80                                                                                                                     | 32.5%            | 224                                    | 26.3%            | 1.1                              |
| White                                                            | 80                                                                                                                     | 48.8%            | 225                                    | 60.4%            | 3.3                              |
| Latino                                                           | 80                                                                                                                     | 30.0%            | 225                                    | 19.1%            | 4.1                              |
| Black                                                            | 80                                                                                                                     | 15.0%            | 225                                    | 8.4%             | 2.8                              |
| Asian                                                            | 80                                                                                                                     | 2.5%             | 225                                    | 6.7%             | 1.9                              |
| Other                                                            | 80                                                                                                                     | 3.8%             | 225                                    | 6.7%             | 0.9                              |
| Graduated from CPS                                               | 80                                                                                                                     | 35.0%            | 225                                    | 26.2%            | 2.2                              |
| Undergraduate GPA (1-100 scale)                                  | 80                                                                                                                     | 90.8             | 225                                    | 91.9             | 1.1                              |
| Prior teaching experience^                                       | N/A (These items are based on PST survey items, so no PST has this information and lacks a focal preparedness measure) |                  |                                        |                  |                                  |
| Age during student-teaching ^                                    |                                                                                                                        |                  |                                        |                  |                                  |
| Parent during student-teaching ^                                 |                                                                                                                        |                  |                                        |                  |                                  |
| <i>CTs</i>                                                       |                                                                                                                        |                  |                                        |                  |                                  |
| Male                                                             | 57                                                                                                                     | 28.1%            | 225                                    | 23.1%            | 0.6                              |
| White                                                            | 57                                                                                                                     | 57.9%            | 225                                    | 68.0%            | 2.1                              |
| Latino                                                           | 57                                                                                                                     | 21.1%            | 225                                    | 24.0%            | 0.2                              |
| Black                                                            | 57                                                                                                                     | 12.3%            | 225                                    | 10.7%            | 0.1                              |
| Asian                                                            | 57                                                                                                                     | 1.8%             | 225                                    | 3.6%             | 0.5                              |
| Other                                                            | 57                                                                                                                     | 7.0%             | 225                                    | 4.9%             | 0.4                              |
| Advanced degree (e.g. M.A.)                                      | 57                                                                                                                     | 71.9%            | 225                                    | 80.0%            | 1.5                              |
| Tenure                                                           | 57                                                                                                                     | 93.0%            | 223                                    | 91.9%            | 0.1                              |
| National Board certification                                     | 57                                                                                                                     | 7.0%             | 223                                    | 21.5%            | 6.3*                             |
| Years of CPS service                                             | 56                                                                                                                     | 12.6             | 222                                    | 11.9             | -0.6                             |
| Average Observational Rating                                     | 56                                                                                                                     | 3.4              | 223                                    | 3.5              | 0.1                              |
| Reading VAM                                                      | 15                                                                                                                     | 0.4              | 71                                     | 0.1              | -0.3                             |
| Math VAM                                                         | 13                                                                                                                     | -0.0             | 55                                     | 0.1              | 0.1                              |
| PST Perception of CT Teaching Effectiveness (Standardized Rasch) | 50                                                                                                                     | -0.0             | 170                                    | -0.0             | 0.0                              |

Note: +p<0.10; \*p<0.05; \*\*p<0.01; \*\*\*p<0.001

**Appendix Table 4: Correlation Matrix of PSTs' First-Year Observational Rating and Domain-Specific Perceived Preparedness**

|                                                  | 1           | 2           | 3     | 4     | 5     | 6     | 7     | 8    | 9    | 10   | 11   | 12   | 13   | 14   | 15   |
|--------------------------------------------------|-------------|-------------|-------|-------|-------|-------|-------|------|------|------|------|------|------|------|------|
| 1. Overall Self-Perceived Preparedness           | 1.00        |             |       |       |       |       |       |      |      |      |      |      |      |      |      |
| 2. Overall CT-Perceived Preparedness             | <b>0.06</b> | 1.00        |       |       |       |       |       |      |      |      |      |      |      |      |      |
| 3. Overall Observational Rating                  | <b>0.03</b> | <b>0.24</b> | 1.00  |       |       |       |       |      |      |      |      |      |      |      |      |
| 4. Self-Perceived: Planning                      | 0.76        | 0.02        | 0.07  | 1.00  |       |       |       |      |      |      |      |      |      |      |      |
| 5. Self-Perceived: Instruction                   | 0.88        | 0.00        | 0.02  | 0.63  | 1.00  |       |       |      |      |      |      |      |      |      |      |
| 6. Self-Perceived: Environment                   | 0.82        | 0.07        | 0.04  | 0.45  | 0.67  | 1.00  |       |      |      |      |      |      |      |      |      |
| 7. Self-Perceived: Prof. Responsibilities        | 0.75        | 0.07        | -0.10 | 0.47  | 0.54  | 0.51  | 1.00  |      |      |      |      |      |      |      |      |
| 8. CT-Perceived: Planning                        | 0.05        | 0.92        | 0.21  | 0.05  | 0.01  | 0.07  | 0.05  | 1.00 |      |      |      |      |      |      |      |
| 9. CT-Perceived: Instruction                     | 0.04        | 0.95        | 0.27  | 0.03  | 0.02  | 0.05  | 0.01  | 0.83 | 1.00 |      |      |      |      |      |      |
| 10. CT-Perceived: Environment                    | 0.03        | 0.91        | 0.23  | -0.03 | -0.05 | 0.07  | 0.07  | 0.76 | 0.84 | 1.00 |      |      |      |      |      |
| 11. CT-Perceived: Prof. Responsibilities         | 0.07        | 0.91        | 0.19  | 0.04  | -0.01 | 0.04  | 0.13  | 0.76 | 0.82 | 0.79 | 1.00 |      |      |      |      |
| 12. Observational Rating: Planning               | -0.02       | 0.18        | 0.91  | 0.06  | -0.03 | -0.02 | -0.12 | 0.16 | 0.21 | 0.15 | 0.14 | 1.00 |      |      |      |
| 13. Observational Rating: Instruction            | 0.10        | 0.22        | 0.89  | 0.11  | 0.10  | 0.13  | -0.04 | 0.20 | 0.26 | 0.20 | 0.16 | 0.73 | 1.00 |      |      |
| 14. Observational Rating: Environment            | 0.05        | 0.27        | 0.93  | 0.09  | 0.05  | 0.05  | -0.07 | 0.22 | 0.30 | 0.24 | 0.22 | 0.81 | 0.87 | 1.00 |      |
| 15. Observational Rating: Prof. Responsibilities | -0.03       | 0.21        | 0.82  | -0.03 | -0.03 | 0.01  | -0.12 | 0.19 | 0.21 | 0.24 | 0.15 | 0.67 | 0.59 | 0.64 | 1.00 |

**Appendix Table 5: Perceived Preparedness and First-Year Effectiveness as a Function of PST and CT Characteristics**

|                                | Self-Perceived PST Preparedness after Student Teaching |                  | CT-Perceived PST Preparedness after Student Teaching |                 | First-Year Observational Rating |                  |
|--------------------------------|--------------------------------------------------------|------------------|------------------------------------------------------|-----------------|---------------------------------|------------------|
|                                | A                                                      | B                | A                                                    | B               | A                               | B                |
| <i>PST Characteristics</i>     |                                                        |                  |                                                      |                 |                                 |                  |
| Male                           | -0.27+<br>(0.14)                                       | -0.30*<br>(0.15) | -0.21<br>(0.14)                                      | -0.23<br>(0.21) | -0.06<br>(0.04)                 | -0.05<br>(0.06)  |
| Asian (vs. White)              | -0.24<br>(0.25)                                        | -0.22<br>(0.29)  | 0.03<br>(0.27)                                       | 0.03<br>(0.34)  | 0.12<br>(0.09)                  | 0.18<br>(0.12)   |
| Black (vs. White)              | 0.15<br>(0.22)                                         | 0.06<br>(0.23)   | -0.09<br>(0.20)                                      | -0.17<br>(0.27) | 0.01<br>(0.07)                  | -0.06<br>(0.10)  |
| Latino (vs. White)             | 0.10<br>(0.16)                                         | -0.02<br>(0.18)  | 0.03<br>(0.16)                                       | -0.06<br>(0.22) | 0.01<br>(0.05)                  | 0.04<br>(0.08)   |
| Other (vs. White)              | -0.32<br>(0.25)                                        | -0.42<br>(0.25)  | -0.12<br>(0.26)                                      | -0.30<br>(0.32) | -0.00<br>(0.08)                 | -0.07<br>(0.10)  |
| Prior teaching experience      | 0.08<br>(0.13)                                         | 0.08<br>(0.14)   | 0.01<br>(0.16)                                       | 0.04<br>(0.17)  | -0.02<br>(0.05)                 | -0.01<br>(0.05)  |
| Undergraduate GPA              | -0.01<br>(0.01)                                        | -0.01<br>(0.01)  | 0.00<br>(0.00)                                       | 0.00<br>(0.01)  | 0.00<br>(0.00)                  | 0.00<br>(0.00)   |
| CPS graduate                   | 0.19<br>(0.14)                                         | 0.20<br>(0.16)   | 0.06<br>(0.14)                                       | -0.00<br>(0.20) | -0.02<br>(0.05)                 | -0.08<br>(0.06)  |
| Parent during student teaching | 0.18<br>(0.20)                                         |                  | -0.10<br>(0.24)                                      |                 | -0.10<br>(0.07)                 |                  |
| Age during student teaching    | 0.00<br>(0.01)                                         |                  | -0.02<br>(0.01)                                      |                 | -0.01+<br>(0.00)                |                  |
| N                              |                                                        | 217              |                                                      | 220             |                                 | 289              |
|                                |                                                        |                  |                                                      |                 |                                 |                  |
| <i>CT Characteristics</i>      |                                                        |                  |                                                      |                 |                                 |                  |
| Male                           | -0.16<br>(0.15)                                        | -0.23<br>(0.19)  | -0.04<br>(0.15)                                      | 0.06<br>(0.16)  | 0.01<br>(0.05)                  | -0.01<br>(0.06)  |
| Asian (vs. White)              | -0.00<br>(0.00)                                        | -0.01<br>(0.00)  | 0.01<br>(0.00)                                       | 0.00<br>(0.00)  | 0.00<br>(0.00)                  | -0.00<br>(0.00)  |
| Black (vs. White)              | 0.00<br>(0.00)                                         | -0.00<br>(0.00)  | -0.00<br>(0.00)                                      | -0.00<br>(0.00) | -0.00+<br>(0.00)                | -0.00<br>(0.00)  |
| Latino (vs. White)             | -0.00<br>(0.00)                                        | -0.00<br>(0.00)  | 0.00<br>(0.00)                                       | 0.00<br>(0.00)  | -0.00<br>(0.00)                 | -0.00<br>(0.00)  |
| Other (vs. White)              | 0.00<br>(0.00)                                         | 0.00<br>(0.00)   | 0.00<br>(0.00)                                       | 0.00<br>(0.00)  | -0.00<br>(0.00)                 | 0.00<br>(0.00)   |
| Advanced degree                | 0.04<br>(0.15)                                         | 0.02<br>(0.18)   | 0.07<br>(0.15)                                       | 0.15<br>(0.16)  | -0.03<br>(0.05)                 | -0.10+<br>(0.06) |
| CPS graduate                   | -0.19<br>(0.16)                                        | -0.15<br>(0.17)  | 0.07<br>(0.14)                                       | 0.06<br>(0.15)  | 0.04<br>(0.05)                  | 0.06<br>(0.06)   |
| White (vs. Non-White)          | -0.00<br>(0.00)                                        |                  | -0.00<br>(0.00)                                      |                 | 0.001*<br>(0.000)               |                  |
| N                              |                                                        | 161              |                                                      | 212             |                                 | 213              |

Notes: See note for Table 6 for more details. (+p<0.10; \*p<0.05; \*\*p<0.01; \*\*\*p<0.001)

**Appendix Table 6: PST and CT Perceptions of Preparedness Rasch Measures**

|                                                                                                                                                                                                                                                                                                                                                                             |                                                                                                                                                                                                                                                                                       |
|-----------------------------------------------------------------------------------------------------------------------------------------------------------------------------------------------------------------------------------------------------------------------------------------------------------------------------------------------------------------------------|---------------------------------------------------------------------------------------------------------------------------------------------------------------------------------------------------------------------------------------------------------------------------------------|
| <b>Planning and Preparation</b><br>(PST reliability=.90; CT reliability = .89)<br>Planning Lessons<br>Designing student assessments<br>Selecting instructional Outcomes<br>Using results From Assessments to Improve Teaching<br>Anticipating student misconceptions about content when planning for class                                                                  | <b>Classroom Environment</b><br>(PST reliability=.90; CT reliability = .89)<br>Developing Relationships With Students<br>Managing Students' Behaviors<br>Implementing Classroom Routines & Procedures<br>Developing Classroom Communities for Learning                                |
| <b>Instruction</b><br>(PST Reliability = .91; CT reliability = .92)<br>Using developmentally appropriate instructional language<br>Posing variety of questions to probe student understanding<br>Facilitating Discussions<br>Maintaining student interest<br>Using variety of instructional methods<br>Adapting curricula to fit students' needs<br>Teaching subject matter | <b>Professional Responsibilities</b><br>(PST reliability = .89; CT reliability = .85)<br>Maintaining Accurate Grades and Student Data<br>Performing Administrative tasks<br>Interacting with school administrators<br>Communicating With Families<br>Reflecting on teaching (CT only) |

## Appendix Table 7: Coaching Rasch Measures

|                                                                                                                                                                                                                                                                                                                                                                                                                                                                                                                                                                                                                 |                                                                                                                                                                                                                                                                                                                                                                                                                                                                |
|-----------------------------------------------------------------------------------------------------------------------------------------------------------------------------------------------------------------------------------------------------------------------------------------------------------------------------------------------------------------------------------------------------------------------------------------------------------------------------------------------------------------------------------------------------------------------------------------------------------------|----------------------------------------------------------------------------------------------------------------------------------------------------------------------------------------------------------------------------------------------------------------------------------------------------------------------------------------------------------------------------------------------------------------------------------------------------------------|
| <p>PST: CT Teaching Effectiveness</p> <p>(Reliability = 0.88)</p> <p><i>How effectively did your mentor teacher:</i></p> <p>Plan lessons</p> <p>Deliver instruction</p> <p>Create &amp; maintain a positive classroom environment</p> <p>Model professionalism</p> <p>Teach in culturally responsive ways</p>                                                                                                                                                                                                                                                                                                   | <p>CT: Domain-Specific Mentoring</p> <p>(Reliability = 0.72)</p> <p><i>How effective do you feel you were in mentoring your student teacher in each of the following areas:</i></p> <p>Planning lessons</p> <p>Delivering instruction</p> <p>Creating &amp; maintaining a positive environment</p> <p>Modeling professionalism</p> <p>Teaching in culturally responsive ways</p>                                                                               |
| <p>PST: Field Instructor Helpfulness</p> <p>(Reliability = 0.89)</p> <p><i>How often did your field instructor/supervisor conduct the following activities:</i></p> <p>Observed PST teach</p> <p>Provided PST with feedback on teaching</p> <p>Observed PST teach frequently enough</p> <p>Provided PST feedback frequently enough</p> <p>Provided feedback that helped PST learn to teach</p> <p>Would recommend field instructor to future PSTs</p>                                                                                                                                                           | <p>CT: Frequency of Feedback</p> <p>(Reliability = 0.76)</p> <p><i>Think about the times you provided feedback to your student teacher about her/his instruction. How often did you:</i></p> <p>Offer concrete suggestions</p> <p>Ask reflective questions</p> <p>Offer general observations</p> <p>Refer to specific things the PST needed to improve</p> <p>Refer to specific things the PST did well</p> <p>Share specific data when providing feedback</p> |
| <p>PST: Domain-Specific Conversations</p> <p>(Reliability = 0.86)</p> <p><i>How much did you learn about the following skills from conversations you had with your mentor:</i></p> <p>Planning lessons</p> <p>Delivering instruction</p> <p>Creating &amp; maintaining a positive environment</p> <p>Modeling professionalism</p> <p>Teaching in culturally responsive ways</p>                                                                                                                                                                                                                                 | <p>CT: Job Search Assistance</p> <p>(Reliability = 0.89)</p> <p><i>With your student teacher, how often did you:</i></p> <p>Offer advice on kinds of jobs to apply for</p> <p>Discuss specific job openings in the FPS</p> <p>Discuss specific job openings elsewhere</p> <p>Offer feedback on PST's resume</p> <p>Help PST prepare for an interview</p>                                                                                                       |
| <p>PST: Mentoring Relationship and Feedback</p> <p>(Reliability = 0.87)</p> <p><i>To what extent do you agree/disagree with the following:</i></p> <p>CT observed me teach frequently enough</p> <p>CT provided feedback frequently enough</p> <p>Feedback CT provided helped me learn to teach</p> <p>Feedback CT gave was consistent with field instructor</p> <p>If I struggled with teaching, I could go to CT for help</p> <p>CT's expectations were appropriate for a beginner</p> <p>CT let me make my own instructional decisions</p> <p>Felt comfortable taking instructional risks in front of CT</p> |                                                                                                                                                                                                                                                                                                                                                                                                                                                                |
| <p>PST: Job Search Assistance</p> <p>(Reliability = 0.85)</p> <p><i>How often did your mentor teacher:</i></p> <p>Offer advice on kinds of jobs to apply for</p> <p>Discuss specific job openings in the FPS</p> <p>Discuss specific job openings elsewhere</p> <p>Offer feedback on PST's resume</p> <p>Help PST prepare for an interview</p>                                                                                                                                                                                                                                                                  |                                                                                                                                                                                                                                                                                                                                                                                                                                                                |
